# Supplementary material
Source: Springer Nature journal article supplement (https://www.springermedizin.de/resource/supplementary/12885_2008_1569_MOESM7_ESM.pdf/9472344)

**Fold change at each time point**

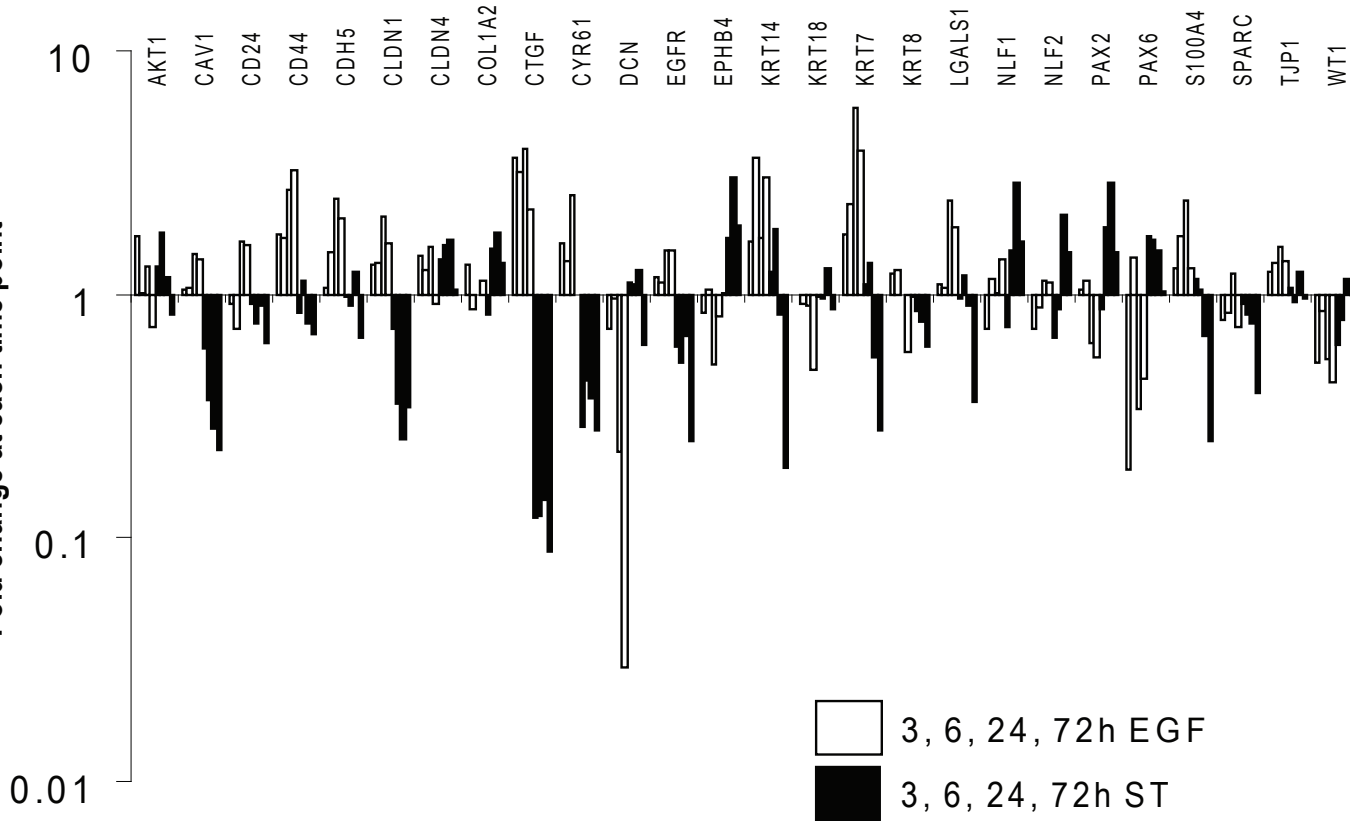

Supplement: MOESM7 [file 9472344]
